# Supplementary material
Source: publisher figshare collection journal article supplement (https://geolsoc.figshare.com/articles/dataset/_/3452891)
Supplement: Supplementary file 1 [file 1]

Supplementary Appendix 2. Assessment input data for the Northwest Greenland Rifted Margin Assessment Unit.

[MMBO, million barrels of oil; BCFG, billion cubic feet of gas; MMBNGL, million barrels of natural-gas liquids; MMBOE, million barrels of oil equivalent; NGL, natural gas liquids; CFG/BO, cubic feet of gas per barrel of oil; BNGL/MMCFG, barrels of natural gas liquids per million cubic feet of gas; BLIQ/MMCFG, barrels of liquids per million cubic feet of gas; AU, assessment unit; TPS, total petroleum system. F75 denotes a 75-percent chance; F25 denotes a 25-percent chance.]

**CIRCUM-ARCTIC RESOURCE ASSESSMENT  
GEOLOGIC DATA FORM FOR CONVENTIONAL ASSESSMENT UNITS (Version 5.1, June 4, 2007)**

**IDENTIFICATION INFORMATION**

|                         |                                   |         |           |
|-------------------------|-----------------------------------|---------|-----------|
| Assessment Geologist:   | C.J. Schenk                       | Date:   | 13-Dec-07 |
| Region:                 | North America                     | Number: | 5         |
| Province:               | West Greenland-East Canada        | Number: | 5208      |
| Total Petroleum System: | Mesozoic-Cenozoic Composite       | Number: | 520801    |
| Assessment Unit:        | Northwest Greenland Rifted Margin | Number: | 52080102  |
| Scenario:               |                                   | Number: |           |
| Based on Data as of:    |                                   |         |           |
| Notes from Assessor:    |                                   |         |           |

**CHARACTERISTICS OF ASSESSMENT UNIT**

Area of assessment unit: 286,000 square kilometers

Minimum assessed accumulation size: 50 MMBOE (grown)

No. of discovered accumulations exceeding minimum size: Oil: 0 Gas: 0

|                           |                   |                   |
|---------------------------|-------------------|-------------------|
| <b>Uncertainty Class:</b> | Check One         | Number            |
| Producing fields          | <u>          </u> | <u>          </u> |
| Discoveries               | <u>          </u> | <u>          </u> |
| Wells                     | <u>    X    </u>  | <u>    4    </u>  |
| Seismic                   | <u>          </u> | <u>          </u> |
| No seismic                | <u>          </u> | <u>          </u> |

Median size (grown) of discovered oil accumulations (MMBO):

|                           |                           |                           |
|---------------------------|---------------------------|---------------------------|
| 1st 3rd <u>          </u> | 2nd 3rd <u>          </u> | 3rd 3rd <u>          </u> |
|---------------------------|---------------------------|---------------------------|

Median size (grown) of discovered gas accumulations (BCFG):

|                           |                           |                           |
|---------------------------|---------------------------|---------------------------|
| 1st 3rd <u>          </u> | 2nd 3rd <u>          </u> | 3rd 3rd <u>          </u> |
|---------------------------|---------------------------|---------------------------|

## ANALOGS USED IN ESTIMATING INPUT

| <u>Purpose</u>                    | <u>Analog or Analog Set</u>                 |
|-----------------------------------|---------------------------------------------|
| 1 <u>Numbers of Accumulations</u> | Rift-Sag                                    |
|                                   |                                             |
|                                   |                                             |
| 2 <u>Sizes of Accumulations</u>   | Rift-Sag                                    |
|                                   |                                             |
|                                   |                                             |
| 3 <u>Ancillary Data</u>           | World averages                              |
|                                   |                                             |
|                                   |                                             |
| 4 _____                           |                                             |
|                                   |                                             |
|                                   |                                             |
| Assessment Unit (name, no.)       | Northwest Greenland Rifted Margin, 52080102 |
| Scenario (name, no.)              |                                             |

Probability of occurrence (0-1.0)

**Scenario Probability:** \_\_\_\_\_

**Assessment-Unit Probabilities:** (Adequacy for at least one undiscovered field of minimum size)

| <u>Attribute</u>                                                      | <u>Probability of occurrence (0-1.0)</u> |
|-----------------------------------------------------------------------|------------------------------------------|
| 1. <b>CHARGE:</b> Adequate petroleum charge:                          | 0.5                                      |
| 2. <b>ROCKS:</b> Adequate reservoirs, traps, and seals:               | 1.0                                      |
| 3. <b>TIMING OF GEOLOGIC EVENTS:</b> Favorable timing:                | 1.0                                      |
| <b>Assessment-Unit GEOLOGIC Probability</b> (Product of 1, 2, and 3): | 0.50                                     |

## UNDISCOVERED ACCUMULATIONS

**Number of Undiscovered Accumulations:** How many undiscovered accumulations exist that are at least the minimum size?: (uncertainty of fixed but unknown values)

|                      |              |                                                       |        |           |         |            |
|----------------------|--------------|-------------------------------------------------------|--------|-----------|---------|------------|
| Total Accumulations: | minimum (>0) | <u>1</u>                                              | median | <u>60</u> | maximum | <u>250</u> |
| Oil/Gas Mix:         | minimum (>0) | <u>10</u>                                             | mode   | <u>60</u> | maximum | <u>90</u>  |
|                      | X            | no. of oil accumulations / no. of total accumulations |        |           |         |            |
|                      |              | no. of oil accumulations / no. of gas accumulations   |        |           |         |            |
|                      |              | no. of gas accumulations / no. of oil accumulations   |        |           |         |            |
| Oil Accumulations:   | minimum (>0) | <u>1</u>                                              | median | <u>30</u> | maximum | <u>225</u> |
| Gas Accumulations:   | minimum (>0) | <u>1</u>                                              | median | <u>27</u> | maximum | <u>225</u> |

**Sizes of Undiscovered Accumulations:** What are the sizes (**grown**) of the above accumulations?: (variations in the sizes of undiscovered accumulations)

|                                  |         |            |        |            |         |              |
|----------------------------------|---------|------------|--------|------------|---------|--------------|
| Oil in Oil Accumulations (MMBO): | minimum | <u>50</u>  | median | <u>110</u> | maximum | <u>10000</u> |
| Gas in Gas Accumulations (BCFG): | minimum | <u>300</u> | median | <u>660</u> | maximum | <u>60000</u> |

## RATIOS FOR UNDISCOVERED ACCUMULATIONS, TO ASSESS COPRODUCTS

(variations in the properties of undiscovered accumulations)

|                                |            |            |              |
|--------------------------------|------------|------------|--------------|
| <u>Oil Accumulations:</u>      | minimum    | median     | maximum      |
| Gas/oil ratio (cfg/bo):        | <u>200</u> | <u>650</u> | <u>10000</u> |
| NGL/gas ratio (bngl/mmcf):     | <u>4</u>   | <u>20</u>  | <u>90</u>    |
| <u>Gas Accumulations:</u>      | minimum    | median     | maximum      |
| Liquids/gas ratio (bliq/mmcf): | <u>2</u>   | <u>20</u>  | <u>85</u>    |

Assessment Unit (name, no.)  
Scenario (name, no.)

Northwest Greenland Rifted Margin, 52080102

## SELECTED ANCILLARY DATA FOR UNDISCOVERED ACCUMULATIONS

(variations in the properties of undiscovered accumulations)

|                                     |             |     |             |     |             |
|-------------------------------------|-------------|-----|-------------|-----|-------------|
| <u>Oil Accumulations:</u>           | minimum     |     | median      |     | maximum     |
| API gravity (degrees):              | <u>23</u>   |     | <u>40</u>   |     | <u>55</u>   |
| Viscosity (centipoise)              | <u>120</u>  |     | <u>280</u>  |     | <u>8200</u> |
| Sulfur content of oil (%):          | <u>0.24</u> |     | <u>0.7</u>  |     | <u>5</u>    |
| Depth (m) of water (if applicable): | <u>0</u>    |     | <u>400</u>  |     | <u>800</u>  |
|                                     | minimum     | F75 | median      | F25 | maximum     |
| Drilling Depth (m):                 | <u>500</u>  |     | <u>2000</u> |     | <u>5000</u> |

|                                     |            |     |             |     |             |
|-------------------------------------|------------|-----|-------------|-----|-------------|
| <u>Gas Accumulations:</u>           | minimum    |     | median      |     | maximum     |
| Inert gas content (%):              | <u>1.5</u> |     | <u>3.8</u>  |     | <u>17</u>   |
| Carbon dioxide content (%):         | <u>1.4</u> |     | <u>5</u>    |     | <u>28</u>   |
| Hydrogen sulfide content (%):       | <u>0.7</u> |     | <u>1.5</u>  |     | <u>6</u>    |
| Depth (m) of water (if applicable): | <u>0</u>   |     | <u>400</u>  |     | <u>800</u>  |
|                                     | minimum    | F75 | median      | F25 | maximum     |
| Drilling Depth (m):                 | <u>500</u> |     | <u>2500</u> |     | <u>9000</u> |

Assessment Unit (name, no.)

Northwest Greenland Rifted Margin, 52080102

Scenario (name, no.)

## ALLOCATIONS OF POTENTIAL ADDITIONS TO RESERVES TO ARCTIC AREA

### 1 North of Arctic Circle

56.01 area % of the AU

Oil in Oil Accumulations: 56.01 volume % of the AU

Gas in Gas Accumulations: 56.01 volume % of the AU

### 2 South of Arctic Circle

43.93 area % of the AU

Oil in Oil Accumulations: 43.93 volume % of the AU

Gas in Gas Accumulations: 43.93 volume % of the AU

Assessment Unit (name, no.)

Northwest Greenland Rifted Margin, 52080102

Scenario (name, no.)

## ALLOCATIONS OF POTENTIAL ADDITIONS TO RESERVES TO COUNTRIES

## 1 Offshore

94.99 area % of the AU

Oil in Oil Accumulations: 94.99 volume % of the AU

Gas in Gas Accumulations: 94.99 volume % of the AU

2 Onshore portion of:

## Greenland

5.01 area % of the AU

Oil in Oil Accumulations: 5.01 volume % of the AU

Gas in Gas Accumulations: 5.01 volume % of the AU

3 Onshore portion of:

Canada

0 area % of the AU

Oil in Oil Accumulations: 0 volume % of the AU

Gas in Gas Accumulations: 0 volume % of the AU

4 Onshore portion of:

area % of the AU

Oil in Oil Accumulations: volume % of the AU

Gas in Gas Accumulations: \_\_\_\_\_ volume % of the AU

5 Onshore portion of:

area % of the AU

Oil in Oil Accumulations: volume % of the AU

Gas in Gas Accumulations: \_\_\_\_\_ volume % of the AU

6 Onshore portion of:

area % of the AU

Oil in Oil Accumulations: volume % of the AU

Gas in Gas Accumulations: \_\_\_\_\_ volume % of the AU

Assessment Unit (name, no.)

Northwest Greenland Rifted Margin, 52080102

Scenario (name, no.)

## ALLOCATIONS OF POTENTIAL ADDITIONS TO RESERVES TO PROVINCES

1 ONSHORE portion of: West Greenland-East Canada

5.01 area % of the AU

Oil in Oil Accumulations: 5.01 volume % of the AU

Gas in Gas Accumulations: 5.01 volume % of the AU

OFFSHORE portion of: West Greenland-East Canada

94.99 area % of the AU

Oil in Oil Accumulations: 94.99 volume % of the AU

Gas in Gas Accumulations: 94.99 volume % of the AU

2 ONSHORE portion of: \_\_\_\_\_

\_\_\_\_\_ area % of the AU

Oil in Oil Accumulations: \_\_\_\_\_ volume % of the AU

Gas in Gas Accumulations: \_\_\_\_\_ volume % of the AU

OFFSHORE portion of: \_\_\_\_\_

\_\_\_\_\_ area % of the AU

Oil in Oil Accumulations: \_\_\_\_\_ volume % of the AU

Gas in Gas Accumulations: \_\_\_\_\_ volume % of the AU

3 ONSHORE portion of: \_\_\_\_\_

\_\_\_\_\_ area % of the AU

Oil in Oil Accumulations: \_\_\_\_\_ volume % of the AU

Gas in Gas Accumulations: \_\_\_\_\_ volume % of the AU

OFFSHORE portion of: \_\_\_\_\_

\_\_\_\_\_ area % of the AU

Oil in Oil Accumulations: \_\_\_\_\_ volume % of the AU

Gas in Gas Accumulations: \_\_\_\_\_ volume % of the AU

Assessment Unit (name, no.)

Northwest Greenland Rifted Margin, 52080102

Scenario (name, no.)

\_\_\_\_\_

## ALLOCATIONS OF POTENTIAL ADDITIONS TO RESERVES TO PROVINCES

4 ONSHORE portion of: \_\_\_\_\_

\_\_\_\_\_ area % of the AU

Oil in Oil Accumulations: \_\_\_\_\_ volume % of the AU

Gas in Gas Accumulations: \_\_\_\_\_ volume % of the AU

OFFSHORE portion of: \_\_\_\_\_

\_\_\_\_\_ area % of the AU

Oil in Oil Accumulations: \_\_\_\_\_ volume % of the AU

Gas in Gas Accumulations: \_\_\_\_\_ volume % of the AU

5 ONSHORE portion of: \_\_\_\_\_

\_\_\_\_\_ area % of the AU

Oil in Oil Accumulations: \_\_\_\_\_ volume % of the AU

Gas in Gas Accumulations: \_\_\_\_\_ volume % of the AU

OFFSHORE portion of: \_\_\_\_\_

\_\_\_\_\_ area % of the AU

Oil in Oil Accumulations: \_\_\_\_\_ volume % of the AU

Gas in Gas Accumulations: \_\_\_\_\_ volume % of the AU

6 ONSHORE portion of: \_\_\_\_\_

\_\_\_\_\_ area % of the AU

Oil in Oil Accumulations: \_\_\_\_\_ volume % of the AU

Gas in Gas Accumulations: \_\_\_\_\_ volume % of the AU

OFFSHORE portion of: \_\_\_\_\_

\_\_\_\_\_ area % of the AU

Oil in Oil Accumulations: \_\_\_\_\_ volume % of the AU

Gas in Gas Accumulations: \_\_\_\_\_ volume % of the AU

Assessment Unit (name, no.)

Northwest Greenland Rifted Margin, 52080102

Scenario (name, no.)

\_\_\_\_\_

## ALLOCATIONS OF POTENTIAL ADDITIONS TO RESERVES TO ICE CONDITIONS

1 Province: West Greenland-East Canada

| Permanent sea ice | area % of the AU |
|-------------------|------------------|
| 1979-1999         | 10.1             |
| 2000-2019         | 10.1             |
| 2020-2039         | 10.1             |
| 2040-2059         | 10.1             |
| 2060-2079         | 10.1             |
| 2080-2099         | 10.1             |
| 2100              | 10.1             |

Oil in Oil Accumulations: volume % of the AU

Gas in Gas Accumulations: \_\_\_\_\_ volume % of the AU

|                        |     |                  |
|------------------------|-----|------------------|
| Semi-permanent sea ice | 100 | area % of the AU |
|------------------------|-----|------------------|

Oil in Oil Accumulations: 100 volume % of the AU

|                           |     |                    |
|---------------------------|-----|--------------------|
| Oil in Oil Accumulations: | 100 | volume % of the AU |
| Gas in Gas Accumulations: | 100 | volume % of the AU |

2 Province:

| Permanent sea ice | area % of the AU |
|-------------------|------------------|
|-------------------|------------------|

Oil in Oil Accumulations: volume % of the AU

Gas in Gas Accumulations: \_\_\_\_\_ volume % of the AU

Semi-permanent sea ice area % of the AU

Oil in Oil Accumulations: volume % of the AU

Gas in Gas Accumulations: \_\_\_\_\_ volume % of the AU

3 Province:

| Permanent sea ice | area % of the AU |
|-------------------|------------------|
|-------------------|------------------|

Oil in Oil Accumulations: volume % of the AU

Gas in Gas Accumulations: \_\_\_\_\_ volume % of the AU

| Semi-permanent sea ice | area % of the AU |
|------------------------|------------------|
| 1979-1983              | 1.0              |
| 1984-1988              | 1.0              |
| 1989-1993              | 1.0              |
| 1994-1998              | 1.0              |
| 1999-2003              | 1.0              |
| 2004-2008              | 1.0              |
| 2009-2013              | 1.0              |
| 2014-2018              | 1.0              |
| 2019-2023              | 1.0              |
| 2024-2028              | 1.0              |
| 2029-2033              | 1.0              |
| 2034-2038              | 1.0              |
| 2039-2043              | 1.0              |
| 2044-2048              | 1.0              |
| 2049-2053              | 1.0              |
| 2054-2058              | 1.0              |
| 2059-2063              | 1.0              |
| 2064-2068              | 1.0              |
| 2069-2073              | 1.0              |
| 2074-2078              | 1.0              |
| 2079-2083              | 1.0              |
| 2084-2088              | 1.0              |
| 2089-2093              | 1.0              |
| 2094-2098              | 1.0              |
| 2099-2103              | 1.0              |
| 2104-2108              | 1.0              |
| 2109-2113              | 1.0              |
| 2114-2118              | 1.0              |
| 2119-2123              | 1.0              |
| 2124-2128              | 1.0              |
| 2129-2133              | 1.0              |
| 2134-2138              | 1.0              |
| 2139-2143              | 1.0              |
| 2144-2148              | 1.0              |
| 2149-2153              | 1.0              |
| 2154-2158              | 1.0              |
| 2159-2163              | 1.0              |
| 2164-2168              | 1.0              |
| 2169-2173              | 1.0              |
| 2174-2178              | 1.0              |
| 2179-2183              | 1.0              |
| 2184-2188              | 1.0              |
| 2189-2193              | 1.0              |
| 2194-2198              | 1.0              |
| 2199-2203              | 1.0              |
| 2204-2208              | 1.0              |
| 2209-2213              | 1.0              |
| 2214-2218              | 1.0              |
| 2219-2223              | 1.0              |
| 2224-2228              | 1.0              |
| 2229-2233              | 1.0              |
| 2234-2238              | 1.0              |
| 2239-2243              | 1.0              |
| 2244-2248              | 1.0              |
| 2249-2253              | 1.0              |
| 2254-2258              | 1.0              |
| 2259-2263              | 1.0              |
| 2264-2268              | 1.0              |
| 2269-2273              | 1.0              |
| 2274-2278              | 1.0              |
| 2279-2283              | 1.0              |
| 2284-2288              | 1.0              |
| 2289-2293              | 1.0              |
| 2294-2298              | 1.0              |
| 2299-2303              | 1.0              |
| 2304-2308              | 1.0              |
| 2309-2313              | 1.0              |
| 2314-2318              | 1.0              |
| 2319-2323              | 1.0              |
| 2324-2328              | 1.0              |
| 2329-2333              | 1.0              |
| 2334-2338              | 1.0              |
| 2339-2343              | 1.0              |
| 2344-2348              | 1.0              |
| 2349-2353              | 1.0              |
| 2354-2358              | 1.0              |
| 2359-2363              | 1.0              |
| 2364-2368              | 1.0              |
| 2369-2373              | 1.0              |
| 2374-2378              | 1.0              |
| 2379-2383              | 1.0              |
| 2384-2388              | 1.0              |
| 2389-2393              | 1.0              |
| 2394-2398              | 1.0              |
| 2399-2403              | 1.0              |
| 2404-2408              | 1.0              |
| 2409-2413              | 1.0              |
| 2414-2418              | 1.0              |
| 2419-2423              | 1.0              |
| 2424-2428              | 1.0              |
| 2429-2433              | 1.0              |
| 2434-2438              | 1.0              |
| 2439-2443              | 1.0              |
| 2444-2448              | 1.0              |
| 2449-2453              | 1.0              |
| 2454-2458              | 1.0              |
| 2459-2463              | 1.0              |
| 2464-2468              | 1.0              |
| 2469-2473              | 1.0              |
| 2474-2478              | 1.0              |
| 2479-2483              | 1.0              |
| 2484-2488              | 1.0              |
| 2489-2493              | 1.0              |
| 2494-2498              | 1.0              |
| 2499-2503              | 1.0              |
| 2504-2508              | 1.0              |
| 2509-2513              | 1.0              |
| 2514-2518              | 1.0              |
| 2519-2523              | 1.0              |
| 2524-2528              | 1.0              |
| 2529-2533              | 1.0              |
| 2534-2538              | 1.0              |
| 2539-2543              | 1.0              |
| 2544-2548              | 1.0              |
| 2549-2553              | 1.0              |
| 2554-2558              | 1.0              |
| 2559-2563              | 1.0              |
| 2564-2568              | 1.0              |
| 2569-2573              | 1.0              |
| 2574-2578              | 1.0              |
| 2579-2583              | 1.0              |
| 2584-2588              | 1.0              |
| 2589-2593              | 1.0              |
| 2594-2598              | 1.0              |
| 2599-2603              | 1.0              |
| 2604-2608              | 1.0              |
| 2609-2613              | 1.0              |
| 2614-2618              | 1.0              |
| 2619-2623              | 1.0              |
| 2624-2628              | 1.0              |
| 2629-2633              | 1                |

Oil in Oil Accumulations: volume % of the AU

Gas in Gas Accumulations: \_\_\_\_\_ volume % of the AU
