# Supplementary material
Source: publisher figshare collection journal article supplement (https://geolsoc.figshare.com/articles/dataset/_/3452891)
Supplement: Supplementary file 3 [file 1]

Supplementary Appendix 4. Assessment input data for the Baffin Bay Basin Assessment Unit.

[MMBO, million barrels of oil; BCFG, billion cubic feet of gas; MMBNGL, million barrels of natural-gas liquids; MMBOE, million barrels of oil equivalent; NGL, natural gas liquids; CFG/BO, cubic feet of gas per barrel of oil; BNGL/MMCFG, barrels of natural gas liquids per million cubic feet of gas; BLIQ/MMCFG, barrels of liquids per million cubic feet of gas; AU, assessment unit; TPS, total petroleum system. F75 denotes a 75-percent chance; F25 denotes a 25-percent chance.]

**Appendix 7.**  
**CIRCUM-ARCTIC RESOURCE ASSESSMENT**  
**GEOLOGIC DATA FORM FOR CONVENTIONAL ASSESSMENT UNITS (Version 5.1, June 4, 2007)**

**IDENTIFICATION INFORMATION**

|                         |                             |         |           |
|-------------------------|-----------------------------|---------|-----------|
| Assessment Geologist:   | C.J. Schenk                 | Date:   | 13-Dec-07 |
| Region:                 | North America               | Number: | 5         |
| Province:               | West Greenland-East Canada  | Number: | 5208      |
| Total Petroleum System: | Mesozoic-Cenozoic Composite | Number: | 520801    |
| Assessment Unit:        | Baffin Bay Basin            | Number: | 52080104  |
| Scenario:               |                             | Number: |           |
| Based on Data as of:    |                             |         |           |
| Notes from Assessor:    |                             |         |           |

**CHARACTERISTICS OF ASSESSMENT UNIT**

Area of assessment unit: 252,000 square kilometers

Minimum assessed accumulation size: 50 MMBOE (grown)

No. of discovered accumulations exceeding minimum size: Oil: 0 Gas: 0

|                           |                   |                   |
|---------------------------|-------------------|-------------------|
| <b>Uncertainty Class:</b> | Check One         | Number            |
| Producing fields          | <u>          </u> | <u>          </u> |
| Discoveries               | <u>          </u> | <u>          </u> |
| Wells                     | <u>          </u> | <u>          </u> |
| Seismic                   | <u>    X    </u>  | <u>          </u> |
| No seismic                | <u>          </u> | <u>          </u> |

Median size (grown) of discovered oil accumulations (MMBO):

|         |                   |         |                   |         |                   |
|---------|-------------------|---------|-------------------|---------|-------------------|
| 1st 3rd | <u>          </u> | 2nd 3rd | <u>          </u> | 3rd 3rd | <u>          </u> |
|---------|-------------------|---------|-------------------|---------|-------------------|

Median size (grown) of discovered gas accumulations (BCFG):

|         |                   |         |                   |         |                   |
|---------|-------------------|---------|-------------------|---------|-------------------|
| 1st 3rd | <u>          </u> | 2nd 3rd | <u>          </u> | 3rd 3rd | <u>          </u> |
|---------|-------------------|---------|-------------------|---------|-------------------|

## ANALOGS USED IN ESTIMATING INPUT

| <u>Purpose</u>                   | <u>Analog or Analog Set</u>                      |
|----------------------------------|--------------------------------------------------|
| 1 <u>Number of Accumulations</u> | <u>Deltas</u><br>_____<br>_____<br>_____         |
| 2 <u>Sizes of Accumulations</u>  | <u>Deltas</u><br>_____<br>_____<br>_____         |
| 3 <u>Ancillary Data</u>          | <u>World averages</u><br>_____<br>_____<br>_____ |
| 4 _____                          | _____<br>_____<br>_____                          |
| Assessment Unit (name, no.)      | <u>Baffin Bay Basin, 52080104</u>                |
| Scenario (name, no.)             | _____                                            |

Probability of occurrence (0-1.0)

**Scenario Probability:** \_\_\_\_\_

**Assessment-Unit Probabilities:** (Adequacy for at least one undiscovered field of minimum size)

| <u>Attribute</u>                                                      | <u>Probability of occurrence (0-1.0)</u> |
|-----------------------------------------------------------------------|------------------------------------------|
| 1. <b>CHARGE:</b> Adequate petroleum charge:                          | <u>0.4</u>                               |
| 2. <b>ROCKS:</b> Adequate reservoirs, traps, and seals:               | <u>0.7</u>                               |
| 3. <b>TIMING OF GEOLOGIC EVENTS:</b> Favorable timing:                | <u>1.0</u>                               |
| <b>Assessment-Unit GEOLOGIC Probability</b> (Product of 1, 2, and 3): | <u>0.28</u>                              |

## UNDISCOVERED ACCUMULATIONS

**Number of Undiscovered Accumulations:** How many undiscovered accumulations exist that are at least the minimum size?: (uncertainty of fixed but unknown values)

|                      |              |                                                       |        |           |         |            |
|----------------------|--------------|-------------------------------------------------------|--------|-----------|---------|------------|
| Total Accumulations: | minimum (>0) | <u>1</u>                                              | median | <u>40</u> | maximum | <u>140</u> |
| Oil/Gas Mix:         | minimum (>0) | <u>10</u>                                             | mode   | <u>50</u> | maximum | <u>90</u>  |
|                      | X            | no. of oil accumulations / no. of total accumulations |        |           |         |            |
|                      |              | no. of oil accumulations / no. of gas accumulations   |        |           |         |            |
|                      |              | no. of gas accumulations / no. of oil accumulations   |        |           |         |            |
| Oil Accumulations:   | minimum (>0) | <u>1</u>                                              | median | <u>20</u> | maximum | <u>125</u> |
| Gas Accumulations:   | minimum (>0) | <u>1</u>                                              | median | <u>20</u> | maximum | <u>125</u> |

**Sizes of Undiscovered Accumulations:** What are the sizes (**grown**) of the above accumulations?: (variations in the sizes of undiscovered accumulations)

|                                  |         |            |        |            |         |              |
|----------------------------------|---------|------------|--------|------------|---------|--------------|
| Oil in Oil Accumulations (MMBO): | minimum | <u>50</u>  | median | <u>120</u> | maximum | <u>6000</u>  |
| Gas in Gas Accumulations (BCFG): | minimum | <u>300</u> | median | <u>720</u> | maximum | <u>36000</u> |

## RATIOS FOR UNDISCOVERED ACCUMULATIONS, TO ASSESS COPRODUCTS

(variations in the properties of undiscovered accumulations)

|                                 |            |             |              |
|---------------------------------|------------|-------------|--------------|
| <u>Oil Accumulations:</u>       | minimum    | median      | maximum      |
| Gas/oil ratio (CFG/BO):         | <u>500</u> | <u>1600</u> | <u>10000</u> |
| NGL/gas ratio (BNGL/MMCFG):     | <u>4</u>   | <u>15</u>   | <u>22</u>    |
| <u>Gas Accumulations:</u>       | minimum    | median      | maximum      |
| Liquids/gas ratio (BLIQ/MMCFG): | <u>3</u>   | <u>20</u>   | <u>80</u>    |

|                             |                                   |
|-----------------------------|-----------------------------------|
| Assessment Unit (name, no.) | <u>Baffin Bay Basin, 52080104</u> |
| Scenario (name, no.)        | <u></u>                           |

## SELECTED ANCILLARY DATA FOR UNDISCOVERED ACCUMULATIONS

(variations in the properties of undiscovered accumulations)

|                                     |             |     |             |     |             |
|-------------------------------------|-------------|-----|-------------|-----|-------------|
| <u>Oil Accumulations:</u>           | minimum     |     | median      |     | maximum     |
| API gravity (degrees):              | <u>23</u>   |     | <u>40</u>   |     | <u>55</u>   |
| Viscosity (centipoise)              | <u>120</u>  |     | <u>280</u>  |     | <u>8200</u> |
| Sulfur content of oil (%):          | <u>0.24</u> |     | <u>0.7</u>  |     | <u>5</u>    |
| Depth (m) of water (if applicable): | <u>700</u>  |     | <u>1500</u> |     | <u>2200</u> |
|                                     | minimum     | F75 | median      | F25 | maximum     |
| Drilling Depth (m):                 | <u>500</u>  |     | <u>2000</u> |     | <u>5000</u> |

|                                     |            |     |             |     |             |
|-------------------------------------|------------|-----|-------------|-----|-------------|
| <u>Gas Accumulations:</u>           | minimum    |     | median      |     | maximum     |
| Inert gas content (%):              | <u>1.5</u> |     | <u>3.8</u>  |     | <u>17</u>   |
| Carbon dioxide content (%):         | <u>1.4</u> |     | <u>5</u>    |     | <u>28</u>   |
| Hydrogen sulfide content (%):       | <u>0.7</u> |     | <u>1.5</u>  |     | <u>6</u>    |
| Depth (m) of water (if applicable): | <u>700</u> |     | <u>1500</u> |     | <u>2200</u> |
|                                     | minimum    | F75 | median      | F25 | maximum     |
| Drilling Depth (m):                 | <u>500</u> |     | <u>2500</u> |     | <u>9000</u> |

|                             |                                   |
|-----------------------------|-----------------------------------|
| Assessment Unit (name, no.) | <u>Baffin Bay Basin, 52080104</u> |
| Scenario (name, no.)        | <u></u>                           |

## ALLOCATIONS OF POTENTIAL ADDITIONS TO RESERVES TO ARCTIC AREA

### 1 North of Arctic Circle

100 area % of the AU

Oil in Oil Accumulations: 100 volume % of the AU

Gas in Gas Accumulations: 100 volume % of the AU

### 2 South of Arctic Circle

0 area % of the AU

Oil in Oil Accumulations: 0 volume % of the AU

Gas in Gas Accumulations: 0 volume % of the AU

|                             |                                    |
|-----------------------------|------------------------------------|
| Assessment Unit (name, no.) | <u>Baffin Bay Basin (52080104)</u> |
| Scenario (name, no.)        | <u></u>                            |

## ALLOCATIONS OF POTENTIAL ADDITIONS TO RESERVES TO COUNTRIES

1 Offshore portion of

100 area % of the AU

Oil in Oil Accumulations: 100 volume % of the AU

Gas in Gas Accumulations: 100 volume % of the AU

2 Onshore portion of:

\_\_\_\_\_ area % of the AU

Oil in Oil Accumulations: \_\_\_\_\_ volume % of the AU

Gas in Gas Accumulations: \_\_\_\_\_ volume % of the AU

3 Offshore portion of:

\_\_\_\_\_ area % of the AU

Oil in Oil Accumulations: \_\_\_\_\_ volume % of the AU

Gas in Gas Accumulations: \_\_\_\_\_ volume % of the AU

4 Onshore portion of:

\_\_\_\_\_ area % of the AU

Oil in Oil Accumulations: \_\_\_\_\_ volume % of the AU

Gas in Gas Accumulations: \_\_\_\_\_ volume % of the AU

5 Onshore portion of:

\_\_\_\_\_ area % of the AU

Oil in Oil Accumulations: \_\_\_\_\_ volume % of the AU

Gas in Gas Accumulations: \_\_\_\_\_ volume % of the AU

6 Onshore portion of:

\_\_\_\_\_ area % of the AU

Oil in Oil Accumulations: \_\_\_\_\_ volume % of the AU

Gas in Gas Accumulations: \_\_\_\_\_ volume % of the AU

Assessment Unit (name, no.)

Baffin Bay Basin, 52080104

Scenario (name, no.)

\_\_\_\_\_

## ALLOCATIONS OF POTENTIAL ADDITIONS TO RESERVES TO PROVINCES

1 ONSHORE portion of: West Greenland-East Canada

0 area % of the AU

Oil in Oil Accumulations: 0 volume % of the AU

Gas in Gas Accumulations: 0 volume % of the AU

OFFSHORE portion of: West Greenland-East Canada

100 area % of the AU

Oil in Oil Accumulations: 100 volume % of the AU

Gas in Gas Accumulations: 100 volume % of the AU

2 ONSHORE portion of: \_\_\_\_\_

\_\_\_\_\_ area % of the AU

Oil in Oil Accumulations: \_\_\_\_\_ volume % of the AU

Gas in Gas Accumulations: \_\_\_\_\_ volume % of the AU

OFFSHORE portion of: \_\_\_\_\_

\_\_\_\_\_ area % of the AU

Oil in Oil Accumulations: \_\_\_\_\_ volume % of the AU

Gas in Gas Accumulations: \_\_\_\_\_ volume % of the AU

3 ONSHORE portion of: \_\_\_\_\_

\_\_\_\_\_ area % of the AU

Oil in Oil Accumulations: \_\_\_\_\_ volume % of the AU

Gas in Gas Accumulations: \_\_\_\_\_ volume % of the AU

OFFSHORE portion of: \_\_\_\_\_

\_\_\_\_\_ area % of the AU

Oil in Oil Accumulations: \_\_\_\_\_ volume % of the AU

Gas in Gas Accumulations: \_\_\_\_\_ volume % of the AU

Assessment Unit (name, no.)

Baffin Bay Basin, 52080104

Scenario (name, no.)

\_\_\_\_\_

## ALLOCATIONS OF POTENTIAL ADDITIONS TO RESERVES TO PROVINCES

4 ONSHORE portion of: \_\_\_\_\_

\_\_\_\_\_ area % of the AU

Oil in Oil Accumulations: \_\_\_\_\_ volume % of the AU

Gas in Gas Accumulations: \_\_\_\_\_ volume % of the AU

OFFSHORE portion of: \_\_\_\_\_

\_\_\_\_\_ area % of the AU

Oil in Oil Accumulations: \_\_\_\_\_ volume % of the AU

Gas in Gas Accumulations: \_\_\_\_\_ volume % of the AU

5 ONSHORE portion of: \_\_\_\_\_

\_\_\_\_\_ area % of the AU

Oil in Oil Accumulations: \_\_\_\_\_ volume % of the AU

Gas in Gas Accumulations: \_\_\_\_\_ volume % of the AU

OFFSHORE portion of: \_\_\_\_\_

\_\_\_\_\_ area % of the AU

Oil in Oil Accumulations: \_\_\_\_\_ volume % of the AU

Gas in Gas Accumulations: \_\_\_\_\_ volume % of the AU

6 ONSHORE portion of: \_\_\_\_\_

\_\_\_\_\_ area % of the AU

Oil in Oil Accumulations: \_\_\_\_\_ volume % of the AU

Gas in Gas Accumulations: \_\_\_\_\_ volume % of the AU

OFFSHORE portion of: \_\_\_\_\_

\_\_\_\_\_ area % of the AU

Oil in Oil Accumulations: \_\_\_\_\_ volume % of the AU

Gas in Gas Accumulations: \_\_\_\_\_ volume % of the AU

Assessment Unit (name, no.)

Baffin Bay Basin, 52080104

Scenario (name, no.)

## ALLOCATIONS OF POTENTIAL ADDITIONS TO RESERVES TO ICE CONDITIONS

1 Province: West Greenland-East Canada

|                           |            |                    |
|---------------------------|------------|--------------------|
| Permanent sea ice         | <u>0</u>   | area % of the AU   |
| Oil in Oil Accumulations: | <u>0</u>   | volume % of the AU |
| Gas in Gas Accumulations: | <u>0</u>   | volume % of the AU |
|                           |            |                    |
| Semi-permanent sea ice    | <u>100</u> | area % of the AU   |
| Oil in Oil Accumulations: | <u>100</u> | volume % of the AU |
| Gas in Gas Accumulations: | <u>100</u> | volume % of the AU |

2 Province: \_\_\_\_\_

|                           |       |                    |
|---------------------------|-------|--------------------|
| Permanent sea ice         | _____ | area % of the AU   |
| Oil in Oil Accumulations: | _____ | volume % of the AU |
| Gas in Gas Accumulations: | _____ | volume % of the AU |
|                           |       |                    |
| Semi-permanent sea ice    | _____ | area % of the AU   |
| Oil in Oil Accumulations: | _____ | volume % of the AU |
| Gas in Gas Accumulations: | _____ | volume % of the AU |

3 Province: \_\_\_\_\_

|                           |       |                    |
|---------------------------|-------|--------------------|
| Permanent sea ice         | _____ | area % of the AU   |
| Oil in Oil Accumulations: | _____ | volume % of the AU |
| Gas in Gas Accumulations: | _____ | volume % of the AU |
|                           |       |                    |
| Semi-permanent sea ice    | _____ | area % of the AU   |
| Oil in Oil Accumulations: | _____ | volume % of the AU |
| Gas in Gas Accumulations: | _____ | volume % of the AU |
