# Supplementary material
Source: publisher figshare collection journal article supplement (https://geolsoc.figshare.com/articles/dataset/_/3452891)
Supplement: Supplementary file 4 [file 1]

Assessment Unit (name, no.) Foredeep Basins, 10080103  
 Scenario (name, no.) \_\_\_\_\_

**Scenario Probability:** \_\_\_\_\_  
 Probability of occurrence (0-1.0)

**Assessment-Unit Probabilities:** (Adequacy for at least one undiscovered field of minimum size)

| <u>Attribute</u>                                                      | <u>Probability of occurrence (0-1.0)</u> |
|-----------------------------------------------------------------------|------------------------------------------|
| 1. <b>CHARGE:</b> Adequate petroleum charge:                          | <u>1.0</u>                               |
| 2. <b>ROCKS:</b> Adequate reservoirs, traps, and seals:               | <u>0.6</u>                               |
| 3. <b>TIMING OF GEOLOGIC EVENTS:</b> Favorable timing:                | <u>0.9</u>                               |
| <b>Assessment-Unit GEOLOGIC Probability</b> (Product of 1, 2, and 3): | <u>0.54</u>                              |

### UNDISCOVERED ACCUMULATIONS

**Number of Undiscovered Accumulations:** How many undiscovered accumulations exist that are at least the minimum size?: (uncertainty of fixed but unknown values)

|                      |                                                                |                  |                   |
|----------------------|----------------------------------------------------------------|------------------|-------------------|
| Total Accumulations: | minimum (>0) <u>1</u>                                          | median <u>16</u> | maximum <u>55</u> |
| Oil/Gas Mix:         | minimum (>0) <u>0</u>                                          | mode <u>0</u>    | maximum <u>15</u> |
|                      | <u>X</u> no. of oil accumulations / no. of total accumulations |                  |                   |
|                      | no. of oil accumulations / no. of gas accumulations            |                  |                   |
|                      | no. of gas accumulations / no. of oil accumulations            |                  |                   |
| Oil Accumulations:   | minimum (>0) <u>0</u>                                          | median <u>1</u>  | maximum <u>8</u>  |
| Gas Accumulations:   | minimum (>0) <u>1</u>                                          | median <u>15</u> | maximum <u>55</u> |

**Sizes of Undiscovered Accumulations:** What are the sizes (**grown**) of the above accumulations?: (variations in the sizes of undiscovered accumulations)

|                                  |                    |                   |                      |
|----------------------------------|--------------------|-------------------|----------------------|
| Oil in Oil Accumulations (MMBO): | minimum <u>50</u>  | median <u>110</u> | maximum <u>1,200</u> |
| Gas in Gas Accumulations (BCFG): | minimum <u>300</u> | median <u>660</u> | maximum <u>5,000</u> |

### RATIOS FOR UNDISCOVERED ACCUMULATIONS, TO ASSESS COPRODUCTS (variations in the properties of undiscovered accumulations)

|                                 |            |              |               |
|---------------------------------|------------|--------------|---------------|
| <u>Oil Accumulations:</u>       | minimum    | median       | maximum       |
| Gas/oil ratio (CFG/BO):         | <u>500</u> | <u>1,000</u> | <u>12,000</u> |
| NGL/gas ratio (BNGL/MMCFG):     | <u>5</u>   | <u>20</u>    | <u>110</u>    |
| <u>Gas Accumulations:</u>       | minimum    | median       | maximum       |
| Liquids/gas ratio (BLIQ/MMCFG): | <u>5</u>   | <u>20</u>    | <u>80</u>     |

Assessment Unit (name, no.)  
 Scenario (name, no.)

Foredeep Basins, 10080103

**SELECTED ANCILLARY DATA FOR UNDISCOVERED ACCUMULATIONS**

(variations in the properties of undiscovered accumulations)

| <u>Oil Accumulations:</u>           | minimum      |     | median       |     | maximum      |
|-------------------------------------|--------------|-----|--------------|-----|--------------|
| API gravity (degrees):              | <u>30</u>    |     | <u>35</u>    |     | <u>40</u>    |
| Viscosity (centipoise)              | <u>0.01</u>  |     | <u>2.9</u>   |     | <u>30</u>    |
| Sulfur content of oil (%):          | <u>0.1</u>   |     | <u>0.4</u>   |     | <u>1</u>     |
| Depth (m) of water (if applicable): | <u>0</u>     |     | <u>10</u>    |     | <u>20</u>    |
|                                     | minimum      | F75 | median       | F25 | maximum      |
| Drilling depth (m):                 | <u>2,000</u> |     | <u>4,000</u> |     | <u>5,500</u> |

| <u>Gas Accumulations:</u>           | minimum      |     | median       |     | maximum      |
|-------------------------------------|--------------|-----|--------------|-----|--------------|
| Inert gas content (%):              | <u>2</u>     |     | <u>4</u>     |     | <u>7</u>     |
| Carbon dioxide content (%):         | <u>0.5</u>   |     | <u>3</u>     |     | <u>6</u>     |
| Hydrogen sulfide content (%):       | <u>0</u>     |     | <u>0.5</u>   |     | <u>2</u>     |
| Depth (m) of water (if applicable): | <u>0</u>     |     | <u>10</u>    |     | <u>20</u>    |
|                                     | minimum      | F75 | median       | F25 | maximum      |
| Drilling depth (m):                 | <u>2,500</u> |     | <u>4,000</u> |     | <u>7,000</u> |

Assessment Unit (name, no.)  
 Scenario (name, no.)

Foredeep Basins, 10080103

**ALLOCATIONS OF POTENTIAL ADDITIONS TO RESERVES TO ARCTIC AREA**

1 North of Arctic Circle \_\_\_\_\_  
57 area % of the AU  
 Oil in Oil Accumulations: 57 volume % of the AU  
 Gas in Gas Accumulations: 57 volume % of the AU

2 South of Arctic Circle \_\_\_\_\_  
43 area % of the AU  
 Oil in Oil Accumulations: 43 volume % of the AU  
 Gas in Gas Accumulations: 43 volume % of the AU

Assessment Unit (name, no.) Foredeep Basins, 10080103  
Scenario (name, no.) \_\_\_\_\_

**ALLOCATIONS OF POTENTIAL ADDITIONS TO RESERVES TO COUNTRIES**

1 Offshore \_\_\_\_\_  
12.9 area % of the AU  
Oil in Oil Accumulations: 12.9 volume % of the AU  
Gas in Gas Accumulations: 12.9 volume % of the AU

2 Onshore portion of: Russian Federation  
87.1 area % of the AU  
Oil in Oil Accumulations: 87.1 volume % of the AU  
Gas in Gas Accumulations: 87.1 volume % of the AU

Assessment Unit (name, no.) Foredeep Basins, 10080103  
Scenario (name, no.) \_\_\_\_\_

**ALLOCATIONS OF POTENTIAL ADDITIONS TO RESERVES TO PROVINCES**

1 ONSHORE portion of: None  
\_\_\_\_\_ area % of the AU  
Oil in Oil Accumulations: \_\_\_\_\_ volume % of the AU  
Gas in Gas Accumulations: \_\_\_\_\_ volume % of the AU

OFFSHORE portion of: None  
\_\_\_\_\_ area % of the AU  
Oil in Oil Accumulations: \_\_\_\_\_ volume % of the AU  
Gas in Gas Accumulations: \_\_\_\_\_ volume % of the AU
